# Supplementary material for: Fe–S complexes containing five-membered heterocycles: novel models for the active site of hydrogenases with unusual low reduction potential
Source: Royal Society of Chemistry journal article supplement (doi:10.1039/b615037c), 2007-01-01
Supplement: b615037c.pdf [file b615037c.pdf]

## Supporting Information

### Fe-S complexes containing five-membered heterocycles: novel models for the active site of hydrogenases with unusual low reduction potential

Shi Jiang,<sup>a</sup> Jianhui Liu,<sup>\*a</sup> Yu Shi,<sup>a</sup> Zhen Wang,<sup>a</sup> Björn Åkermark,<sup>b</sup> and Licheng Sun<sup>\*ac</sup>

<sup>a</sup> State Key Laboratory of Fine Chemicals, DUT-KTH Joint Education and Research Center on Molecular Devices, Dalian University of Technology(DUT), Zhongshan Road 158-40, Dalian 116012, P. R. China; Fax: +86 411 83702185; Tel: +86 411 88993886

<sup>b</sup> Department of Organic Chemistry, Stockholm University, 10691 Stockholm, Sweden

<sup>c</sup> Department of Chemistry, Organic Chemistry, Royal Institute of Technology(KTH), 10044 Stockholm, Sweden

**Electrochemistry Studies of Complexes 6a-6c:** Acetonitrile (Aldrich, spectroscopy grade) used for electrochemical measurements was dried with molecular sieves and then freshly distilled from CaH<sub>2</sub> under N<sub>2</sub>. A solution of 0.1 m *n*Bu<sub>4</sub>NPF<sub>6</sub> (Fluka, electrochemical grade) in CH<sub>3</sub>CN was used as electrolyte, which was degassed by bubbling with dry CO or argon for 10 min before measurement. Electrochemical measurements were recorded using a BAS-100W electrochemical potentiostat at a scan rate of 100 mV/s. Differential Pulse Voltammograms were obtained in a three-electrode cell under argon. The working electrode was a glassy carbon disc (diameter 3 mm) successively polished with 3- and 1- $\mu$ m diamond pastes and sonicated in ion-free water for 10 min. The reference electrode was a non-aqueous Ag/Ag<sup>+</sup> electrode (0.01 m AgNO<sub>3</sub> in CH<sub>3</sub>CN) and the auxiliary electrode was a platinum wire.

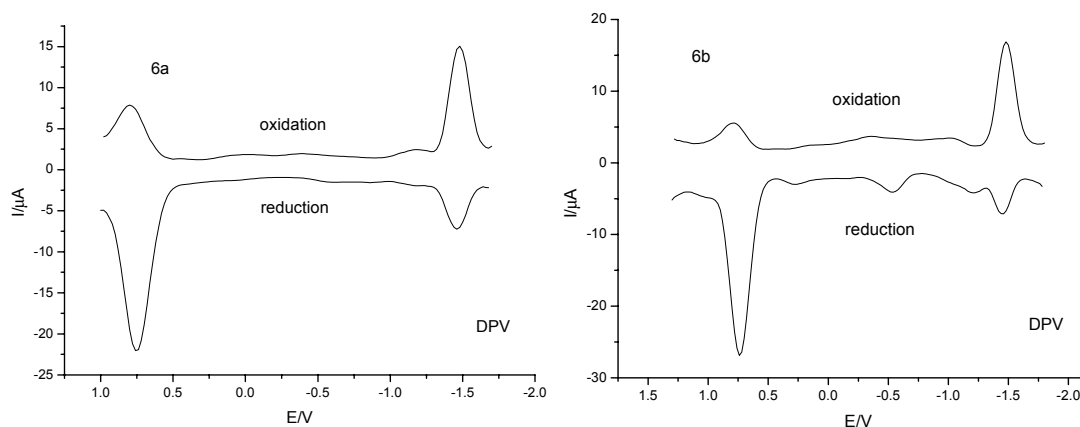

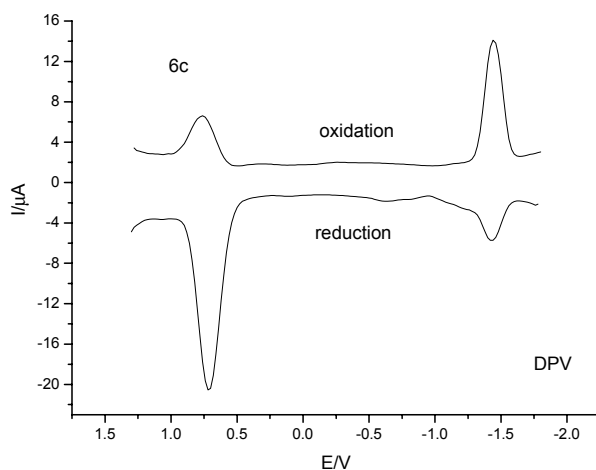

Figure 1 Differential Pulse Voltammograms (DPV) of **6a**, **6b** and **6c** Sample concentration is 1.0 mmol in 0.05 M *n*-Bu<sub>4</sub>NPF<sub>6</sub>/CH<sub>3</sub>CN, scan rate 100 mVs<sup>-1</sup>, working electrode: glassy carbon, surface area: 0.017 cm<sup>2</sup>, reference electrode: Ag/Ag<sup>+</sup>. All potentials are *versus* Fc/Fc<sup>+</sup>

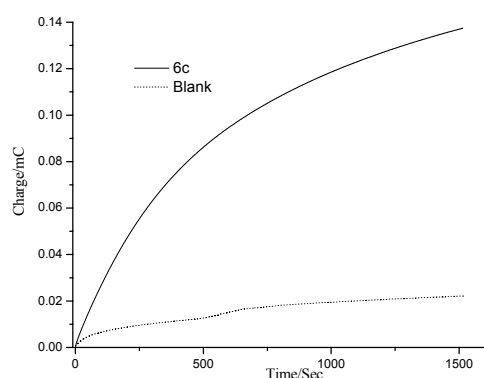

Figure 2 Coulometry for bulk electrolysis at a graphite electrode in the presence of **6c** (—) and blank (···). The electrolysis potential: 0.83 V; the measurement was made on 4mM solutions in CH<sub>3</sub>CN.

### Bulk Electrolysis

Controlled potential electrolysis was performed in a closed cell, with a glassy carbon working electrode ( $R = 0.2\text{cm}$ , and  $L = 0.8\text{ cm}$ ; surface area: *ca* 1.14 cm<sup>2</sup>). The electrolyte solution was degassed by bubbling with dry N<sub>2</sub> for 10 min before measurement. Bubbles got out from the surface of the glassy carbon disk were carefully taken out by syringe for GC analysis, proved to be the molecular hydrogen. Gas chromatography was performed with a GC7890 instrument under isothermal conditions with nitrogen as a carrier gas and a thermal conductivity detector (TCD).

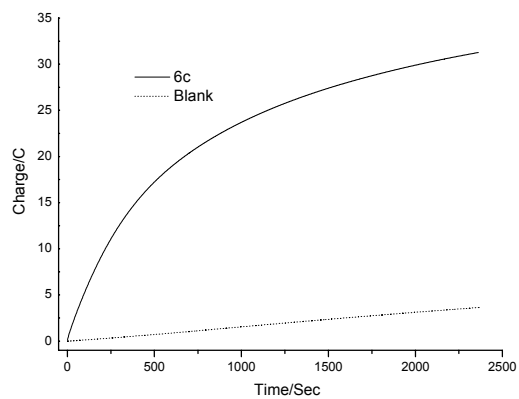

Figure 3 Coulometry for bulk electrolysis of  $\text{HClO}_4$  (50 mM) at a graphite electrode in the presence of **6c** (—) and blank (···). The electrolysis potential:  $-1.2$  V; the measurement was made on 5mM solutions in  $\text{CH}_3\text{CN}$ .
